# Supplementary material for: Heterogeneous Formation of Particulate Nitrate under Ammonium-rich Regime during the high PM 2.5 events in Nanjing, China
Source: Copernicus journal article supplement (doi:10.5194/acp-2019-752), 2019-09-04
Supplement: Supplementary file 1 [file acp-2019-752-supplement.pdf]

## *Supplementary Materials*

### **Heterogeneous Formation of Particulate Nitrate under Ammonium-rich Regime during the high PM<sub>2.5</sub> events in Nanjing, China**

**Yu-Chi Lin<sup>1,2,3</sup>, Yan-Lin Zhang<sup>1,2,3\*</sup>, Mei-Yi Fan<sup>1,2,3</sup>, Mengying Bao<sup>1,2,3</sup>**

<sup>1</sup>. *Yale-NUIST Center on Atmospheric Environment, International Joint Laboratory on Climate and Environment Change, Nanjing University of Information Science and Technology, Nanjing, 210044, China.*

<sup>2</sup>. *Key Laboratory Meteorological Disaster; Ministry of Education & Collaborative Innovation Center on Forecast and Evaluation of Meteorological Disaster, Nanjing University of Information Science and Technology, Nanjing, 210044, China.*

<sup>3</sup>. *Jiangsu Provincial Key Laboratory of Agricultural Meteorology, College of Applied Meteorology, Nanjing University of Information Science & Technology, Nanjing 210044, China.*

*Corresponded to Yan-Lin Zhang (dryanlinzhang@outlook.com; zhangyanlin@nuist.edu.cn )*

#### **Contents of this file**

Table S1, Figure S1 to Figure S5

#### **Introduction**

Table S1 lists the summarized information for PM<sub>2.5</sub> events occurred during the experimental periods. We also presented the rates and pathways of particulate NO<sub>3</sub><sup>-</sup> formation in the thigh PM<sub>2.5</sub> events. Figure S1 shows the equivalent concentrations of cations and anions in PM<sub>2.5</sub> in Nanjing during the sampling periods. Figure S2 plots average concentrations of water-soluble inorganic ions in PM<sub>2.5</sub> during different seasons in Nanjing City. Figure S3 shows the theoretical and observed P<sub>HNO<sub>3</sub></sub>·P<sub>NH<sub>3</sub></sub>

values during the sampling periods. Figure S4 illustrates scatter plots of  $\text{NO}_3^-$ ,  $\text{SO}_4^{2-}$  and  $\text{NH}_4^+$  against  $\text{PM}_{2.5}$  mass in Nanjing City during the sampling periods. Figure S5 shows the scatter plot of  $\text{NO}_3^-$  vs. excess- $\text{NH}_4^+$  molar concentrations in Nanjing during the sampling periods.

In Table S1, we defined the  $\text{PM}_{2.5}$  haze days with hourly  $\text{PM}_{2.5}$  concentrations of exceeding  $150 \mu\text{g m}^{-3}$  and the high  $\text{PM}_{2.5}$  levels should be lasted more than 3 hours. During the high  $\text{PM}_{2.5}$  events, the maximum formation rate of  $\text{NO}_3^-$  ( $F_{\text{NO}_3^-}$ ) can be calculated as:

$$F_{\text{NO}_3^-} = \frac{([\text{NO}_3^-]_m - [\text{NO}_3^-]_i)}{[\text{NO}_3^-]_i \Delta h} / ([\text{CO}]_m / [\text{CO}]_i)$$

where  $[\text{NO}_3^-]_i$  is the nitrate concentration at the initial time during the  $\text{PM}_{2.5}$  event .  $[\text{NO}_3^-]_m$  is the maximum nitrate concentrations during the  $\text{PM}_{2.5}$  event. Both parameters are in units of  $\mu\text{g m}^{-3}$ .  $\Delta h$  (hours) denotes the duration between the initial time and the time when  $\text{NO}_3^-$  concentration reached the maximum value during the  $\text{PM}_{2.5}$  event.  $[\text{CO}]_m$  is the CO concentration when the  $\text{NO}_3^-$  concentration reach the maximum value during the  $\text{PM}_{2.5}$  event.  $[\text{CO}]_i$  is the CO concentration at the initial time during the  $\text{PM}_{2.5}$  event. Both units of  $[\text{CO}]_m$  and  $[\text{CO}]_i$  are in units of ppm. Here,  $[\text{CO}]_m / [\text{CO}]_i$  can be considered a dilution factor of the atmosphere.

Table S1 Summarized information for occurrence of high PM<sub>2.5</sub> events, formation rate and potential mechanisms for particulate NO<sub>3</sub><sup>-</sup>.

| Events    | Time of occurrence      | Formation rate of NO <sub>3</sub> <sup>-</sup> (% h <sup>-1</sup> ) | Behaviors of AWLC and Ox                    | Potential mechanisms                                                    |
|-----------|-------------------------|---------------------------------------------------------------------|---------------------------------------------|-------------------------------------------------------------------------|
| 2016      |                         |                                                                     |                                             |                                                                         |
| Case I    | 3/3 18:00 – 3/4 03:00   | 5.5                                                                 | ALWC and Ox Kept constant levels            | NO <sub>2</sub> + OH / N <sub>2</sub> O <sub>5</sub> + H <sub>2</sub> O |
| Case II   | 3/4 08:00 – 3/4 14:00   | 2.4                                                                 | Decreasing ALWC and increasing Ox           | NO <sub>2</sub> + OH                                                    |
| Case III  | 3/4 23:00 – 3/5 03:00   | 26.7                                                                | Increasing ALWC and decreasing Ox           | N <sub>2</sub> O <sub>5</sub> + H <sub>2</sub> O                        |
| Case IV   | 3/5 14:00 – 3/5 21:00   | 15.4                                                                | Increasing ALWC and decreasing Ox           | N <sub>2</sub> O <sub>5</sub> + H <sub>2</sub> O                        |
| Case V    | 3/6 09:00 – 3/6 20:00   | 2.5                                                                 | Decreasing ALWC and increasing Ox           | NO <sub>2</sub> + OH                                                    |
| Case VI   | 3/14 22:00 – 3/15 04:00 | 6.0                                                                 | Increasing ALWC and increasing Ox           | NO <sub>2</sub> + OH / N <sub>2</sub> O <sub>5</sub> + H <sub>2</sub> O |
| Case VII  | 3/18 09:00-3/18 18:00   | 13.7                                                                | Increasing ALWC and decreasing Ox           | N <sub>2</sub> O <sub>5</sub> + H <sub>2</sub> O                        |
| Case VIII | 3/19 07:00 – 3/19 16:00 | 11.0                                                                | Decreasing ALWC and decreasing Ox           | NO <sub>2</sub> + OH / N <sub>2</sub> O <sub>5</sub> + H <sub>2</sub> O |
| Case IX   | 5/7 02:00 – 5/7 08:00   | 4.0                                                                 | Increasing ALWC and decreasing Ox           | N <sub>2</sub> O <sub>5</sub> + H <sub>2</sub> O                        |
| 2017      |                         |                                                                     |                                             |                                                                         |
| Case X    | 1/23 17:00 -1/23 21:00  | 10.4                                                                | Increasing ALWC and Ox kept constant levels | N <sub>2</sub> O <sub>5</sub> + H <sub>2</sub> O                        |
| Case XI   | 2/6 00:00 – 2/6 05:00   | 11.4                                                                | Increasing ALWC and Ox kept constant levels | N <sub>2</sub> O <sub>5</sub> + H <sub>2</sub> O                        |
| Case XII  | 2/13 22:00 – 2/14 06:00 | 6.7                                                                 | Increasing ALWC and Ox kept constant levels | N <sub>2</sub> O <sub>5</sub> + H <sub>2</sub> O                        |

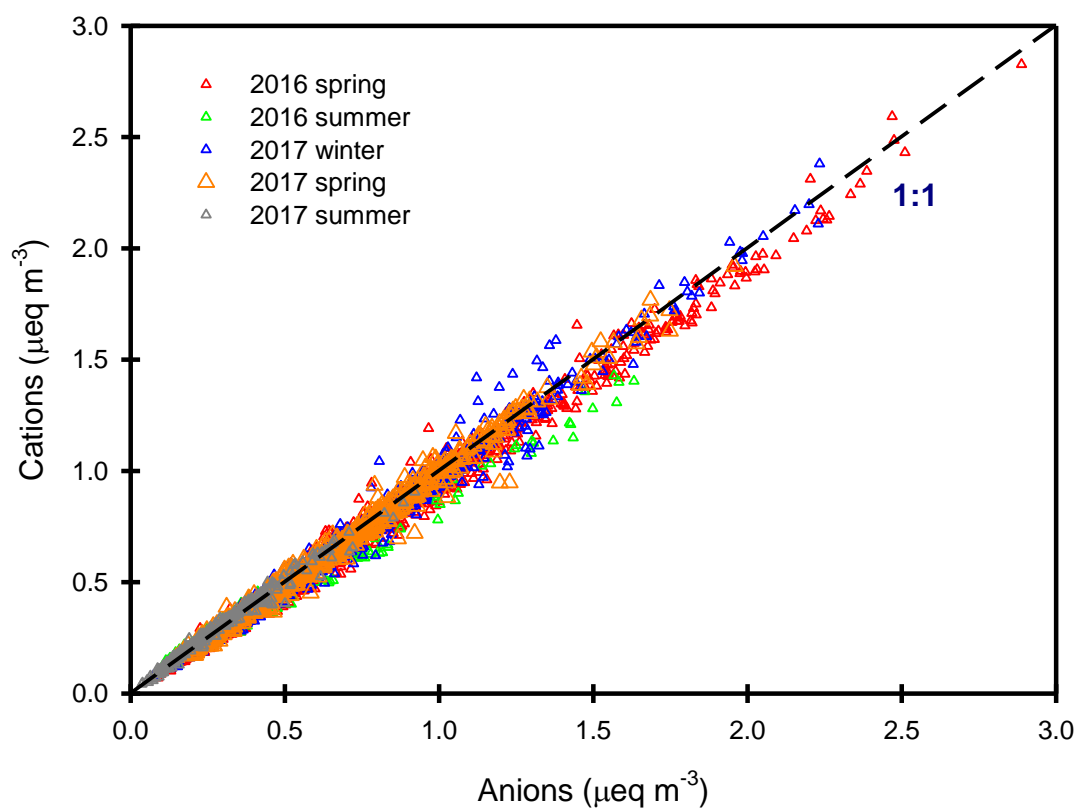

**Figure S1** Equivalent concentrations of cations and anions in PM<sub>2.5</sub> in Nanjing during the sampling periods.

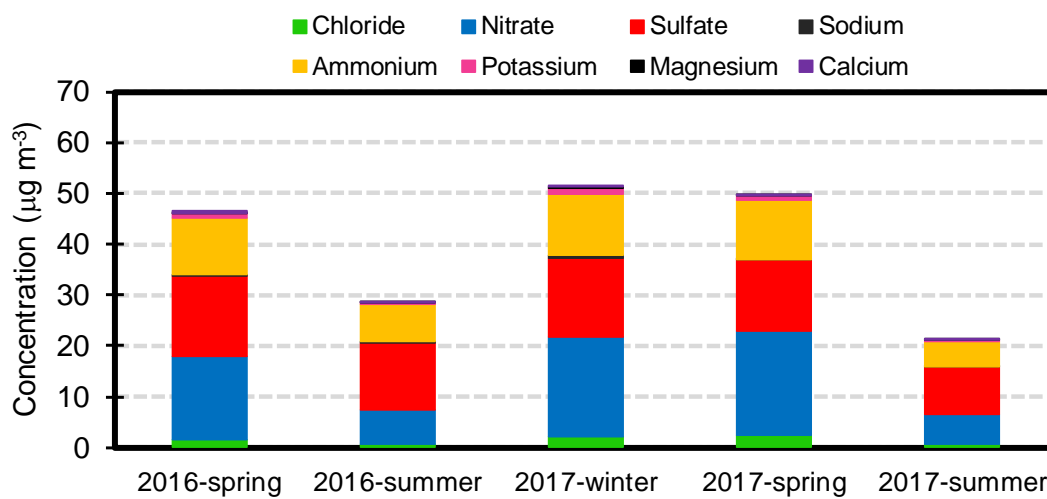

**Figure S2** Average concentrations of water-soluble inorganic ions in PM<sub>2.5</sub> observed in Nanjing City during the different seasons.

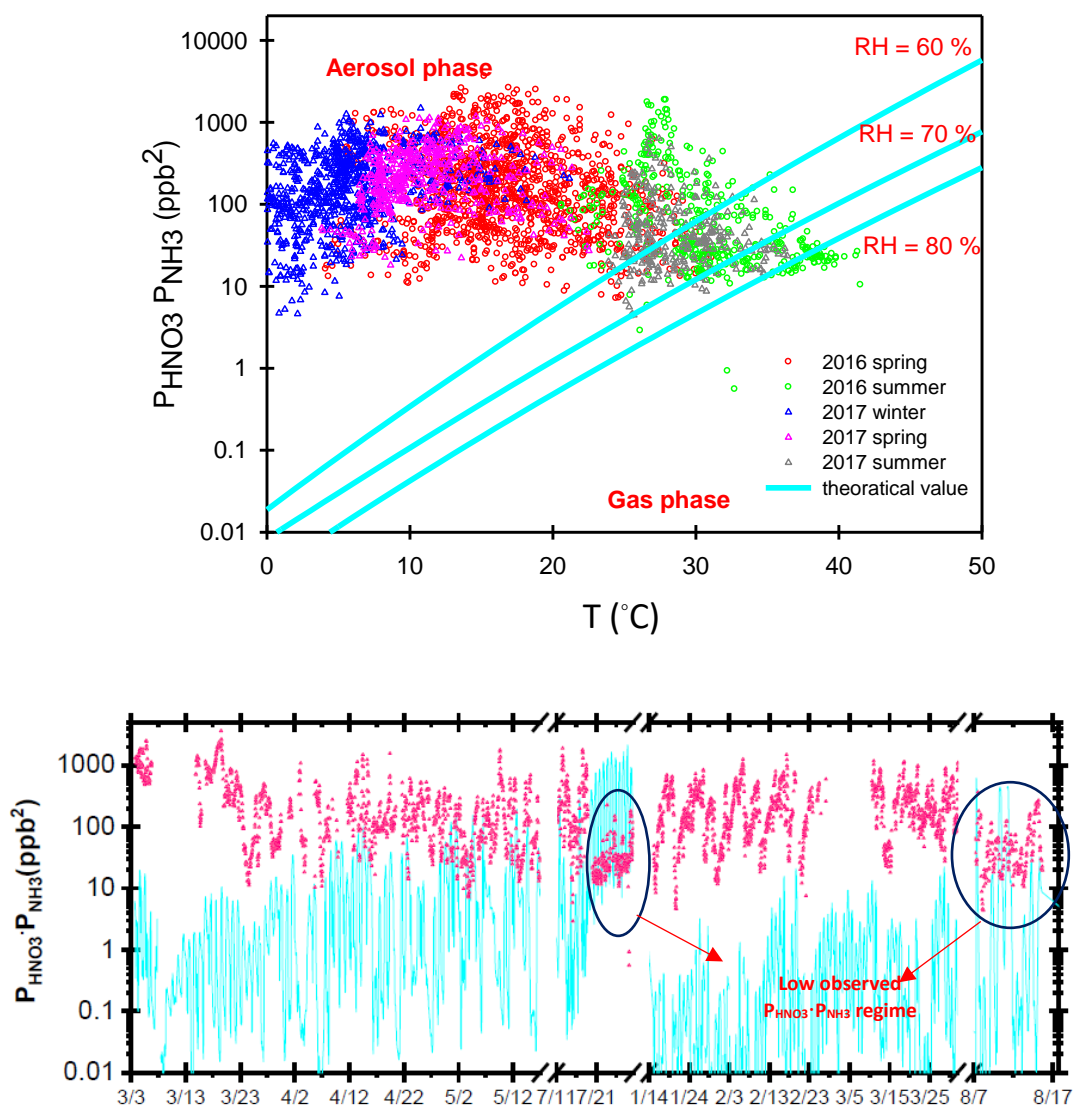

**Figure S3** (a) Theoretical (solid lines) and observed (circles and triangles) equilibrium constants ( $P_{\text{HNO}_3} \cdot P_{\text{NH}_3}$ ) of partitioned  $\text{NO}_3^-$  and  $\text{NH}_4^+$  between aerosol and gas phase in different ambient temperature and relative humidity and (b) time series of theoretical (blue line) and observed  $P_{\text{HNO}_3} \cdot P_{\text{NH}_3}$  values (pink dots) during the sampling periods.

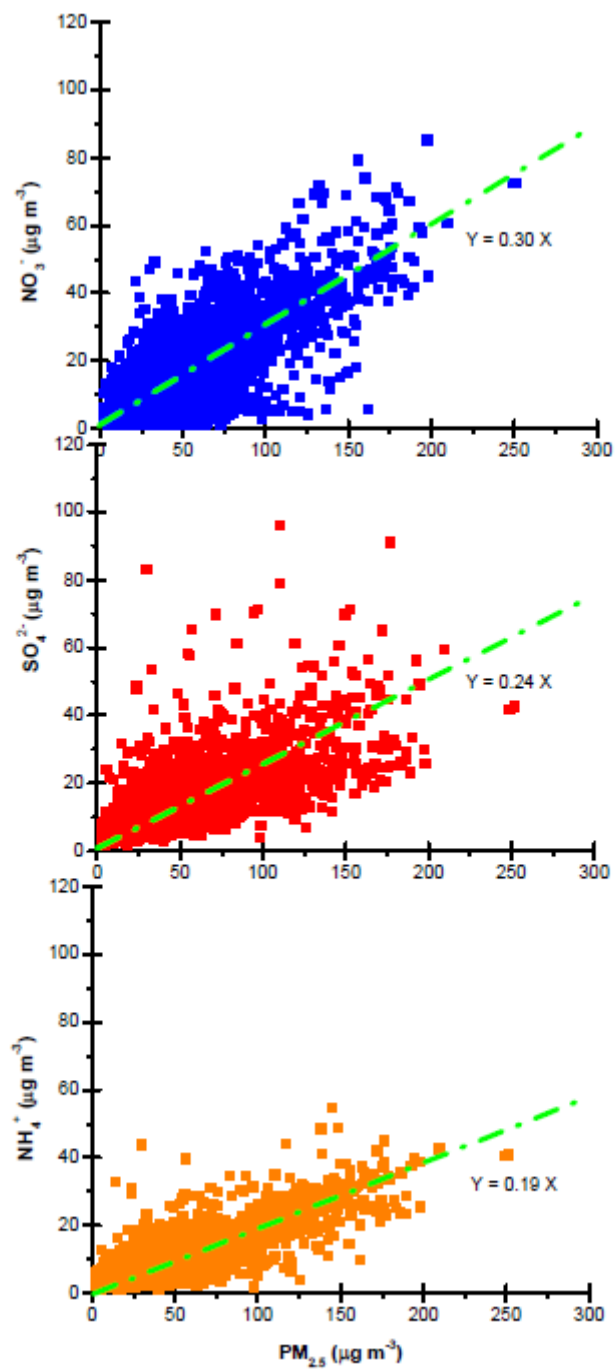

**Figure S4** Scatter plots of  $NO_3^-$ ,  $SO_4^{2-}$  and  $NH_4^+$  against  $PM_{2.5}$  mass in Nanjing City during the sampling periods.

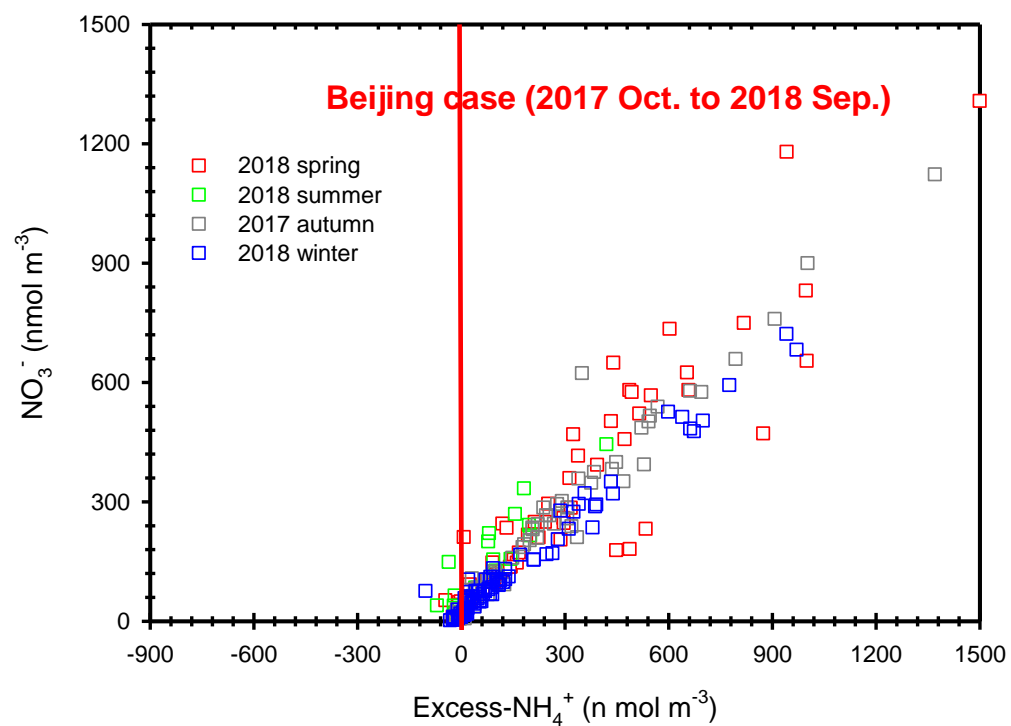

**Figure S5** Scatter plot of  $\text{NO}_3^-$  vs. excess- $\text{NH}_4^+$  molar concentrations in Beijing from October 2017 to September 2018 (Dao et al., 2019).



## References

Dao, X., Lin, Y.-C., Cao, F., Di, S.-Y., Hong, Y., Xing, G., Li, J., Fu, P., & Zhang, Y.-L. (2019). Introduction to the aerosol chemical composition monitoring network of China: objects, current status and outlook. *Bulletin of the American Meteorological Society*, accepted.
